# Supplementary material
Source: HighWire-hosted journal article supplement (https://bmjopen.bmj.com/content/9/1/e021693)
Supplement: inline-supplementary-material-1 [file inline-supplementary-material-1.pdf]

**Supplementary Table 1. Assessment of risk of bias for studies evaluating the prognostic value of MUC1**

| Author<br>(Year)    | Were adequate<br>eligibility criteria<br>developed and<br>applied | Was the<br>measurement<br>of both exposure<br>and outcome<br>adequate? | Was<br>confounding<br>adequately<br>controlled for? | Was the follow-up<br>complete and<br>adequate in duration? | Are reports of the study<br>free of suggestion of<br>selective outcome<br>reporting? | Was the study free<br>of other problems<br>that put it at a high<br>risk of bias? | Risk of<br>bias |
|---------------------|-------------------------------------------------------------------|------------------------------------------------------------------------|-----------------------------------------------------|------------------------------------------------------------|--------------------------------------------------------------------------------------|-----------------------------------------------------------------------------------|-----------------|
| Higashi (2012)      | YES                                                               | YES                                                                    | YES                                                 | Unclear                                                    | YES                                                                                  | YES                                                                               | Low             |
| Huang (2010)        | YES                                                               | YES                                                                    | NO                                                  | YES                                                        | YES                                                                                  | YES                                                                               | Low             |
| Park (2009)         | YES                                                               | YES                                                                    | YES                                                 | YES                                                        | YES                                                                                  | YES                                                                               | Low             |
| Boonla(2005         | YES                                                               | YES                                                                    | NO                                                  | YES                                                        | YES                                                                                  | YES                                                                               | High            |
| Shibahara<br>(2004) | YES                                                               | YES                                                                    | YES                                                 | YES                                                        | YES                                                                                  | YES                                                                               | Low             |
| Matsumura<br>(2002) | YES                                                               | YES                                                                    | YES                                                 | YES                                                        | YES                                                                                  | YES                                                                               | Low             |
| Tamada (2002)       | YES                                                               | YES                                                                    | YES                                                 | Unclear                                                    | YES                                                                                  | YES                                                                               | Unclear         |
| Higashi (1999)      | YES                                                               | YES                                                                    | YES                                                 | Unclear                                                    | YES                                                                                  | YES                                                                               | Unclear         |
| Takao(1999)         | YES                                                               | YES                                                                    | YES                                                 | YES                                                        | YES                                                                                  | YES                                                                               | Low             |
