# Supplementary material
Source: HighWire-hosted journal article supplement (https://bmjopen.bmj.com/content/9/1/e021693)
Supplement: inline-supplementary-material-2 [file inline-supplementary-material-2.pdf]

**Supplementary Table 2. Assessment of risk of bias for studies evaluating the diagnostic capability of WFA-MUC1**

| Author<br>(Year)            | Representative<br>spectrum? | Acceptable reference<br>standard? | Acceptable delay<br>between tests? | Partial verification<br>avoided? | Differential verification<br>avoided? | Index test results<br>blinded? | Withdrawals<br>explained? |
|-----------------------------|-----------------------------|-----------------------------------|------------------------------------|----------------------------------|---------------------------------------|--------------------------------|---------------------------|
| Shoda (2017)                | YES                         | YES                               | YES                                | NO                               | YES                                   | Unclear                        | YES                       |
| Yamaguchi (2016)            | YES                         | YES                               | YES                                | NO                               | YES                                   | Unclear                        | YES                       |
| Matsuda <sup>+</sup> (2015) | YES                         | YES                               | Unclear                            | NO                               | YES                                   | YES                            | YES                       |
| Matsuda <sup>‡</sup> (2015) | YES                         | YES                               | Unclear                            | NO                               | YES                                   | YES                            | YES                       |
| Zen (2014)                  | YES                         | YES                               | YES                                | YES                              | YES                                   | YES                            | YES                       |
| Esperança (2014)            | YES                         | YES                               | YES                                | YES                              | YES                                   | YES                            | YES                       |
| Matsuda (2013)              | YES                         | YES                               | YES                                | NO                               | YES                                   | Unclear                        | YES                       |
| Matsuda (2010)              | YES                         | YES                               | YES                                | NO                               | YES                                   | Unclear                        | YES                       |
| Huang (2010)                | YES                         | YES                               | YES                                | YES                              | YES                                   | YES                            | YES                       |

<sup>+</sup>, Cohort1; <sup>‡</sup>, cohort2

#### Items chosen to score from QUADAS checklist

- 1# Was the spectrum of patients representative of those who will receive the test in practice?
- 2# Was the reference standard likely to correctly classify patients cholangiocarcinoma?
- 3# Was the time period between reference standard and index test short enough to be reasonably sure that the target condition did not change between the two tests?
- 4# Did the whole sample or a random selection of the sample receive verification using a reference standard?
- 5# Did patients receive the same reference standard regardless of the index test result?
- 6# Were the reference standard results interpreted without knowledge of the results of the index test?
- 7# Were withdrawals from the study explained?
